# Supplementary material for: PBT2 acts through a different mechanism of action than other 8-hydroxyquinolines: an X-ray fluorescence imaging study
Source: Royal Society of Chemistry journal article supplement (doi:10.1039/d0mt00222d), 2020-11-02
Supplement: d0mt00222d1.pdf [file d0mt00222d1.pdf]

## Supplementary information for

### **PBT2 acts through a different anti-cancer mechanism of action than other 8-hydroxyquinolines: An X-ray fluorescence imaging study**

Kelly L. Summers,\* Natalia V. Dolgova, Kenneth B. Gagnon, George J. Sopasis, Ashley K. James, Barry Lai, Nicole J. Sylvain, Hugh H. Harris, Helen K. Nichol, Graham N. George,\* Ingrid J. Pickering\*

\*Corresponding Authors: Kelly L. Summers, e-mail: [kelly.summers@usask.ca](mailto:kelly.summers@usask.ca); Graham N. George, e-mail: [g.george@usask.ca](mailto:g.george@usask.ca); Ingrid J. Pickering, e-mail: [ingrid.pickering@usask.ca](mailto:ingrid.pickering@usask.ca)

#### **Contents**

|                                                                                                                                    |   |
|------------------------------------------------------------------------------------------------------------------------------------|---|
| Figure S.1. <sup>1</sup> H-NMR of PBT2 in d <sup>6</sup> DMSO.....                                                                 | 2 |
| Table S.1. Number and area of individual cells imaged using X-ray fluorescence imaging over all experiments .....                  | 3 |
| Figure S.2. Light microscope images of C6 glioma cells treated with 8HQs with or without Cu(II) 24 h post-treatment .....          | 4 |
| Figure S.3. Areal density of sulfur in X-ray fluorescence images of C6 glioma cells treated with either 5 or 30 μM CQ or B2Q ..... | 5 |
| Reference .....                                                                                                                    | 5 |

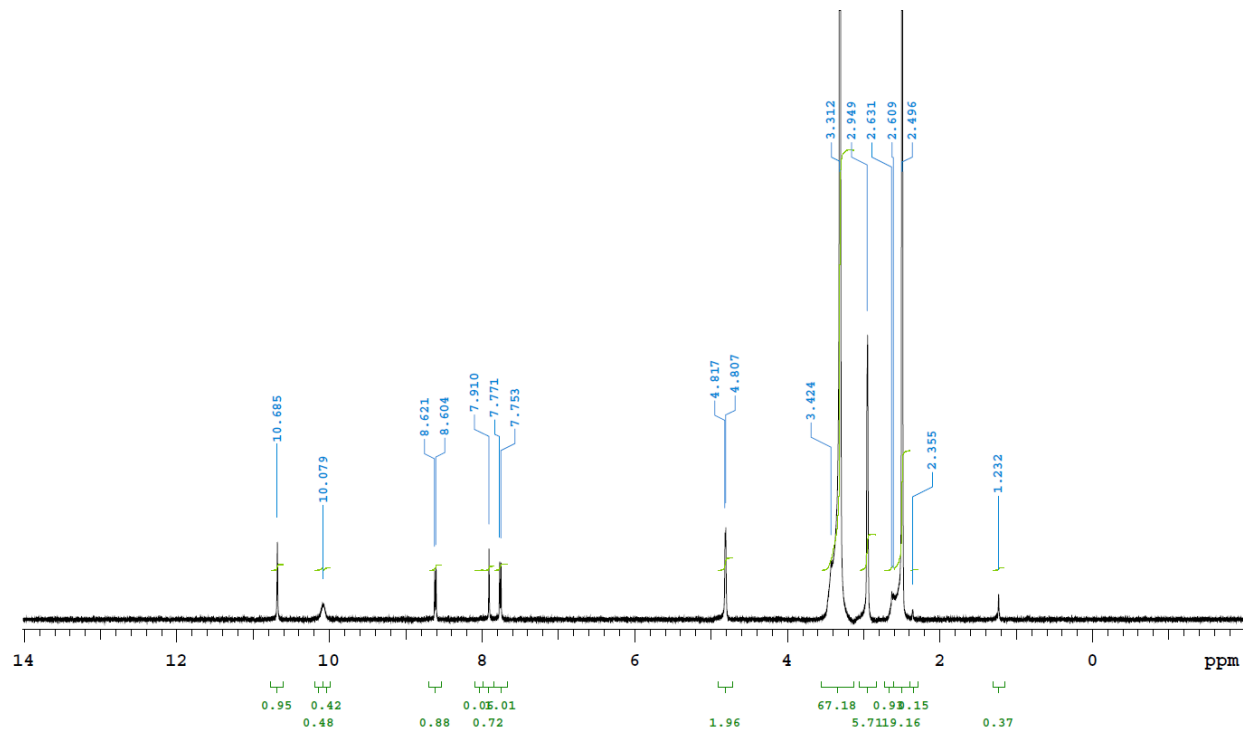

**Figure S.1.**  $^1\text{H-NMR}$  of PBT2 in  $d_6$  DMSO. No unknown impurities were found. Spectrum is consistent with NMR resonances reported by Barnham *et al.*<sup>1</sup>

**Table S.1. Number and area of individual cells imaged using X-ray fluorescence imaging over all experiments.<sup>a</sup>**

| Treatment                                                             | Number of Cells Imaged<br>( <i>n</i> ) | Mean Area of Cells<br>Imaged ( $\mu\text{m}^2$ ) |
|-----------------------------------------------------------------------|----------------------------------------|--------------------------------------------------|
| Untreated                                                             | 4                                      | 259.5                                            |
| Vehicle control (DMSO)                                                | 3                                      | 373.5                                            |
| Vehicle control (50% DMSO, 50% H <sub>2</sub> O)                      | 7                                      | 311.9                                            |
| 5 $\mu\text{M}$ CuCl <sub>2</sub> (DMSO)                              | 8                                      | 317.8                                            |
| 15 $\mu\text{M}$ CuCl <sub>2</sub> (DMSO)                             | 9                                      | 364.9                                            |
| 5 $\mu\text{M}$ CuCl <sub>2</sub> (50% DMSO, 50% H <sub>2</sub> O)    | 7                                      | 365.3                                            |
| 15 $\mu\text{M}$ CuCl <sub>2</sub> (50% DMSO, 50% H <sub>2</sub> O)   | 4                                      | 267.5                                            |
| 5 $\mu\text{M}$ PBT2 <sup>b</sup>                                     | 5                                      | 321.8                                            |
| 5 $\mu\text{M}$ PBT2, 5 $\mu\text{M}$ CuCl <sub>2</sub> <sup>b</sup>  | 9                                      | 370.2                                            |
| 5 $\mu\text{M}$ PBT2, 15 $\mu\text{M}$ CuCl <sub>2</sub> <sup>b</sup> | 8                                      | 275.0                                            |
| 5 $\mu\text{M}$ CQ                                                    | 15                                     | 327.5                                            |
| 5 $\mu\text{M}$ CQ, 5 $\mu\text{M}$ CuCl <sub>2</sub>                 | 10                                     | 271.4                                            |
| 5 $\mu\text{M}$ CQ, 15 $\mu\text{M}$ CuCl <sub>2</sub>                | 8                                      | 381.8                                            |
| 30 $\mu\text{M}$ CQ                                                   | 3                                      | 436.1                                            |
| 5 $\mu\text{M}$ B2Q                                                   | 9                                      | 356.0                                            |
| 5 $\mu\text{M}$ B2Q, 5 $\mu\text{M}$ CuCl <sub>2</sub>                | 6                                      | 248.6                                            |
| 5 $\mu\text{M}$ B2Q, 15 $\mu\text{M}$ CuCl <sub>2</sub>               | 9                                      | 349.0                                            |
| 30 $\mu\text{M}$ B2Q                                                  | 3                                      | 139.7                                            |

<sup>a</sup> Number of cells imaged (*n*) in each treatment varies due to the size of cells including projections and the orientation of cells in a raster-scanned area. <sup>b</sup> PBT2 treatments were dissolved in 50% DMSO, 50% diH<sub>2</sub>O

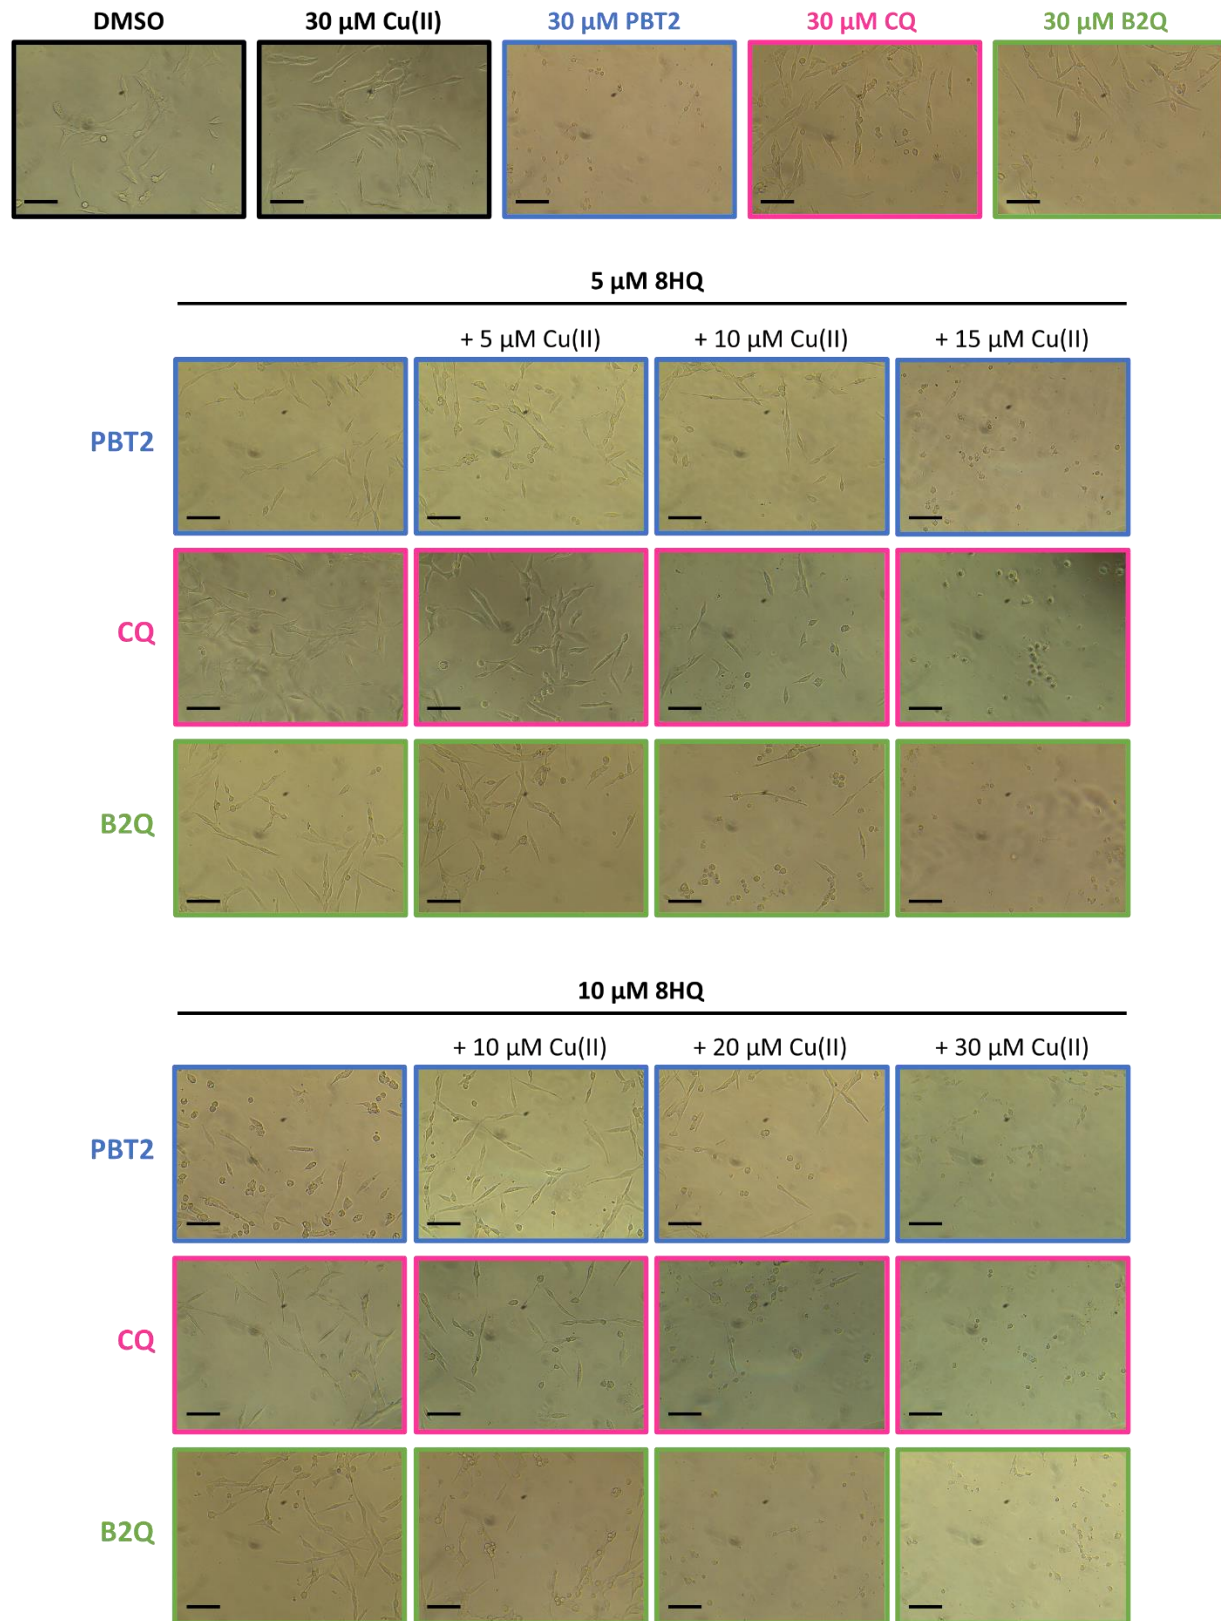

**Figure S.2. Light microscope images of C6 glioma cells treated with 8HQs with or without Cu(II) 24 h post-treatment. Scale bars represent 100  $\mu\text{m}$ .**

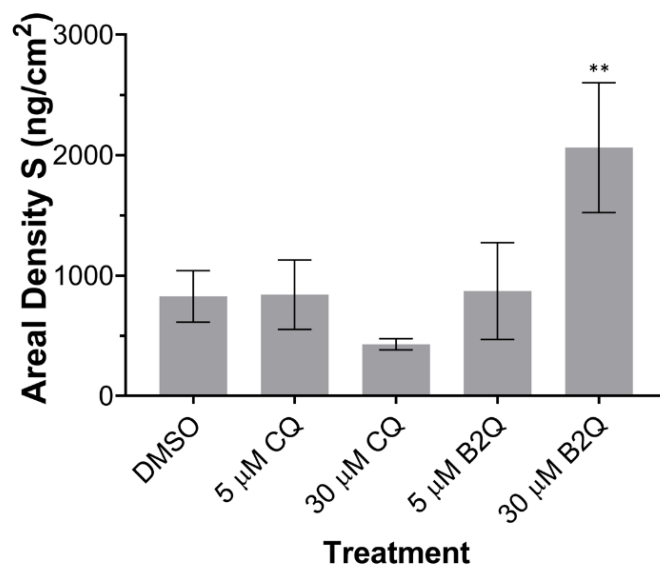

**Figure S.3. Areal density of sulfur in X-ray fluorescence images of C6 glioma cells treated with either 5 or 30  $\mu$ M CQ or B2Q.** Bars represent the mean of each group where  $n > 3$  (see Section 2.4 and Table S.1 for details). Error bars indicate standard deviation. Statistical significance is denoted as \*\* ( $p = 0.0016$ ).

## Reference

1. Barnham, K. J., Gautier, E. C. L., Kok, G. B., and Krippner, G. (2008) Preparation of 8-hydroxyquinolines for treatment of neurological conditions, U.S. Pat. Appl. Publ., Patent version number 20080161353 A1, United States.
